# Supplementary material for: Long-lasting alterations to DNA methylation and ncRNAs could underlie the effects of fetal alcohol exposure in mice
Source: PubMed Central journal article supplement (PMC3701217; doi:10.1242/dmm.010975), 2013-04-10
Supplement: supp_010975_DMM010975.pdf [file supp_010975_DMM010975.pdf]

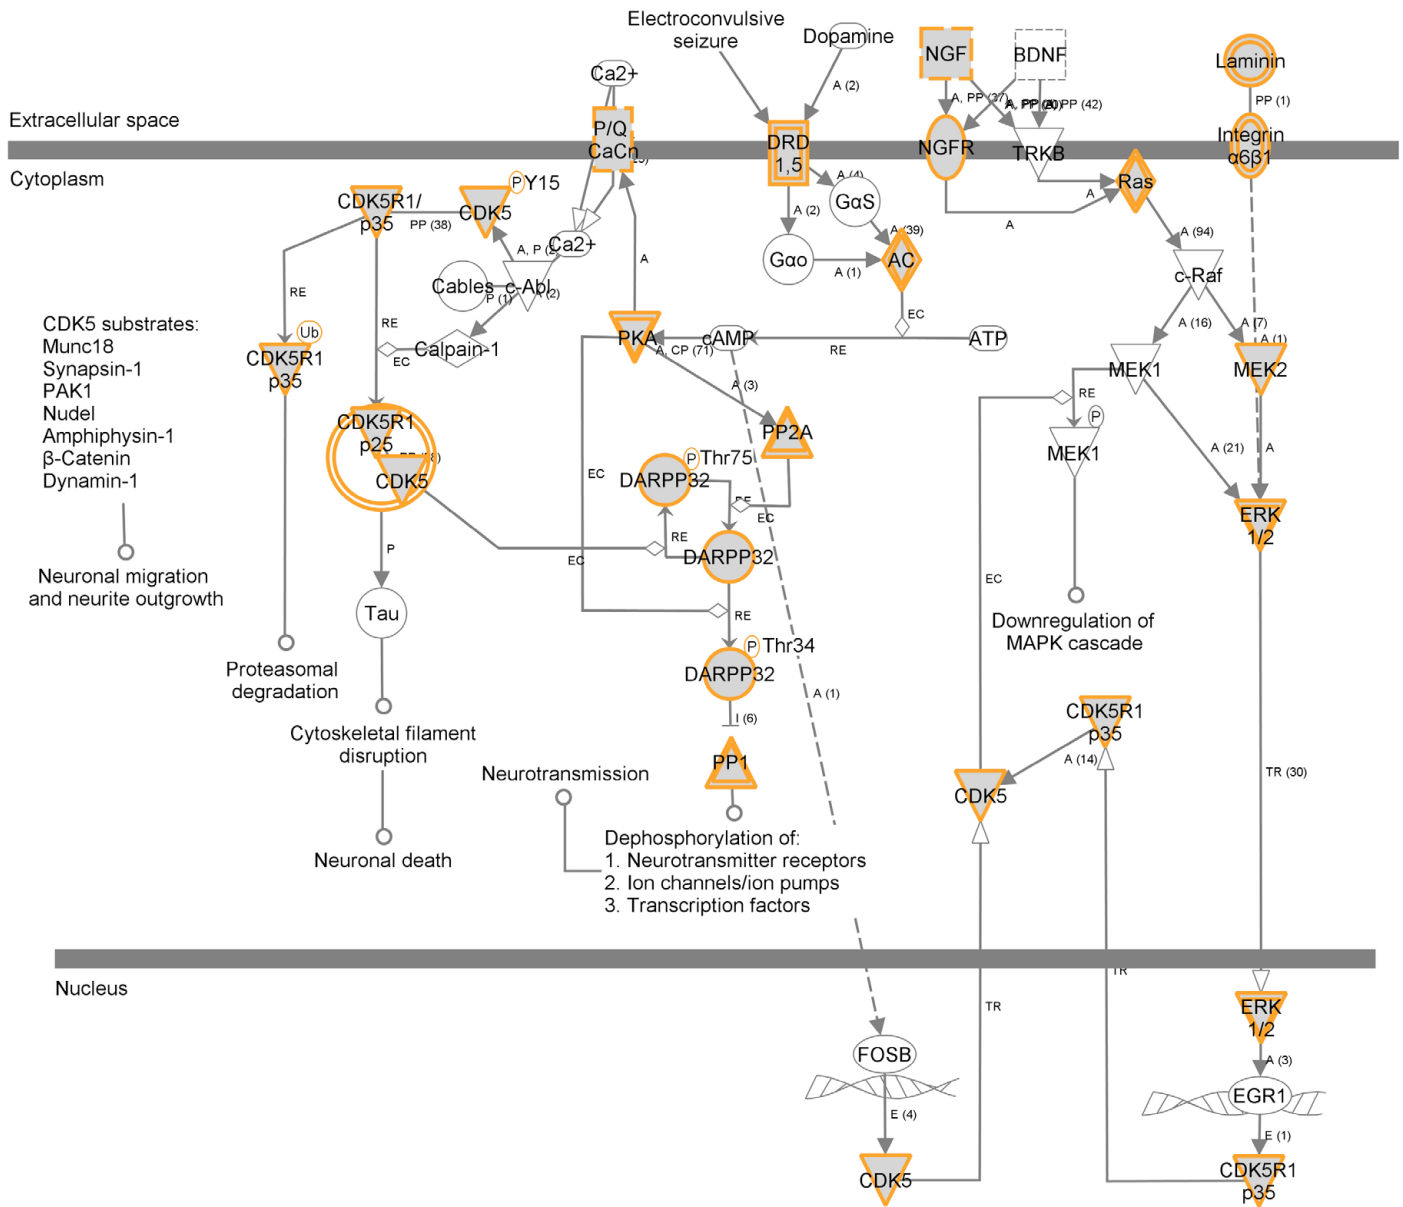

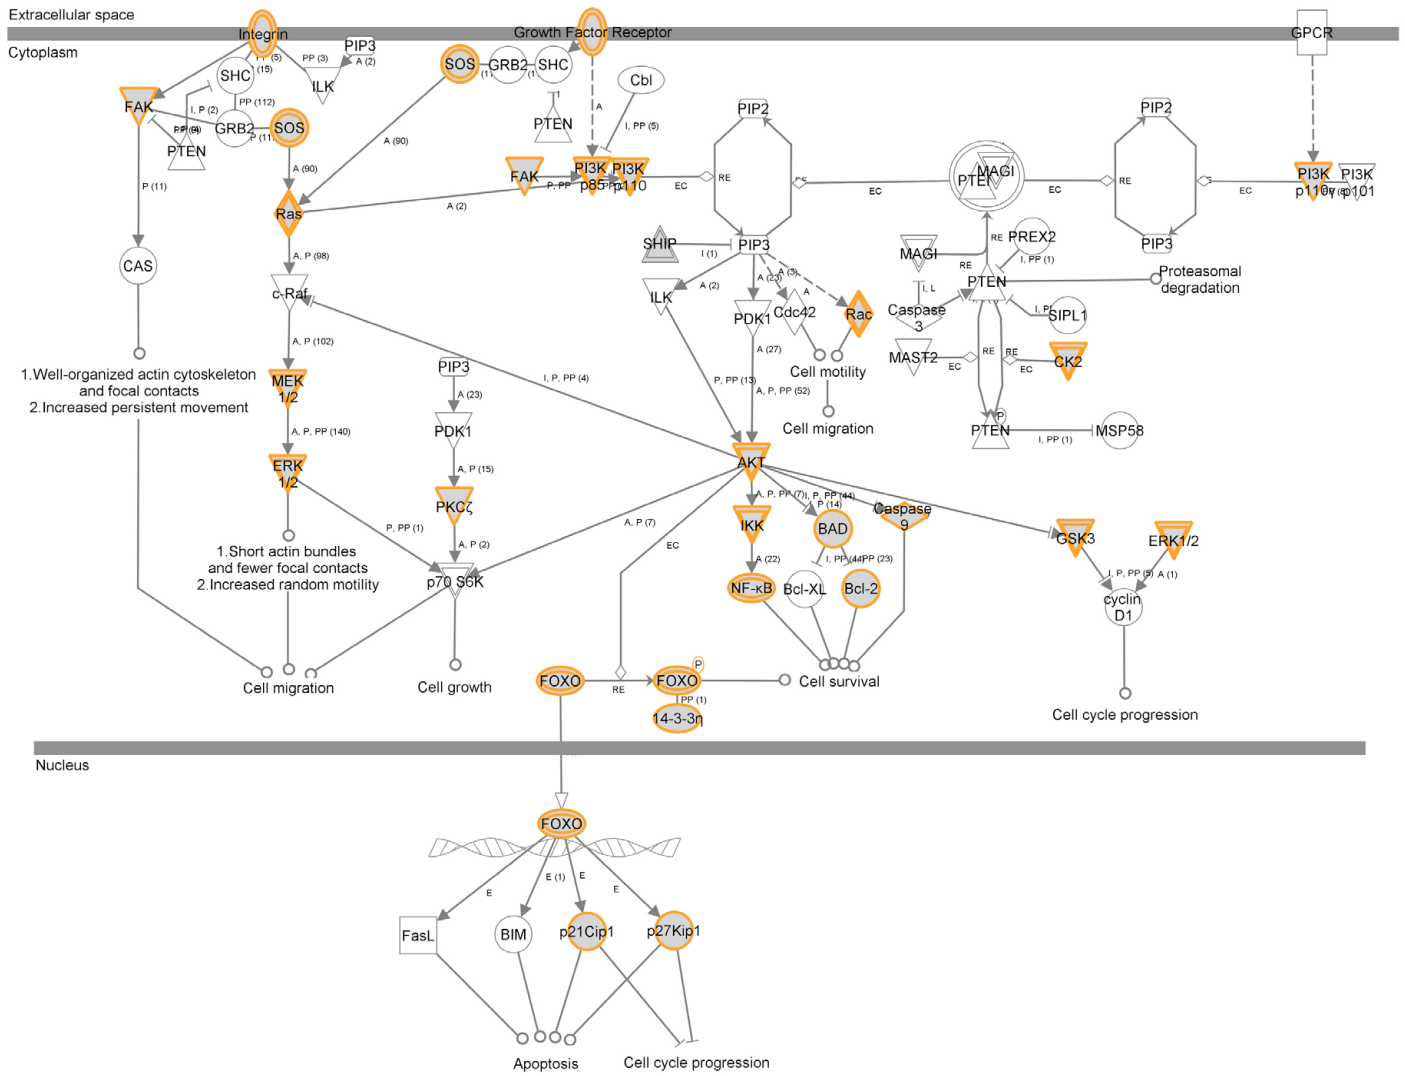

**Fig. S1. Top affected network from all significantly differentially methylated promoters identified by IPA; “Behaviour, Neurological Disease, and Psychological Disorders”.**

**Fig. S2. Ingenuity pathway analysis of the *CDK5* signaling pathway.** Genes showing significant differential methylation upon FAE are highlighted.

**Fig. S3. Ingenuity pathway analysis of the *PTEN* signaling pathway.** Genes showing significant differential methylation upon FAE are highlighted.

**Table S1. Complete Ingenuity® miRNA target filter analysis of the gene expression and miRNA expression data from maternal voluntary consumption model.** Results are filtered based on a moderate or high confidence of interaction, brain specificity, and an inverse miRNA to target mRNA relationship.

| miRNA             | Fold Change | Gene           | Fold Change | Confidence |
|-------------------|-------------|----------------|-------------|------------|
| <i>let-7d*</i>    | -1.463      | <i>Aak1</i>    | 1.244       | High       |
| <i>mir-124*</i>   | -1.316      | <i>Aak1</i>    | 1.244       | High       |
| <i>mir-133b</i>   | -1.352      | <i>Aak1</i>    | 1.244       | High       |
| <i>mir-369-5p</i> | -1.336      | <i>Aak1</i>    | 1.244       | High       |
| <i>mir-199b*</i>  | -1.206      | <i>Aak1</i>    | 1.244       | Moderate   |
| <i>mir-25</i>     | -1.224      | <i>Aak1</i>    | 1.244       | High       |
| <i>mir-27a</i>    | -1.379      | <i>Aak1</i>    | 1.244       | High       |
| <i>mir30a*</i>    | -1.279      | <i>Aak1</i>    | 1.244       | Moderate   |
| <i>mir-495</i>    | -1.232      | <i>Aak1</i>    | 1.244       | High       |
| <i>mir-331-3p</i> | -1.174      | <i>Aak1</i>    | 1.244       | High       |
| <i>mir-34b-3p</i> | -1.334      | <i>Aak1</i>    | 1.244       | High       |
| <i>mir-362-5p</i> | -1.167      | <i>Aak1</i>    | 1.244       | Moderate   |
| <i>mir-500</i>    | -1.284      | <i>Aak1</i>    | 1.244       | High       |
| <i>mir-124*</i>   | -1.316      | <i>Adamts9</i> | 1.225       | High       |
| <i>mir-369-5p</i> | -1.336      | <i>Adamts9</i> | 1.225       | High       |
| <i>mir-25</i>     | -1.224      | <i>Adamts9</i> | 1.225       | High       |
| <i>mir-30a*</i>   | -1.279      | <i>Adamts9</i> | 1.225       | High       |
| <i>mir-495</i>    | -1.232      | <i>Adamts9</i> | 1.225       | High       |
| <i>mir-34b-3p</i> | -1.334      | <i>Adamts9</i> | 1.225       | High       |
| <i>mir-362-5p</i> | -1.167      | <i>Adamts9</i> | 1.225       | High       |
| <i>mir-500</i>    | -1.284      | <i>Adamts9</i> | 1.225       | Moderate   |
| <i>mir-1224</i>   | 1.528       | <i>Ankrd49</i> | -1.208      | Moderate   |

|                    |        |                |        |                       |
|--------------------|--------|----------------|--------|-----------------------|
| <i>mir-489</i>     | 1.190  | <i>Ankrd49</i> | -1.208 | High                  |
| <i>mir-743a</i>    | 1.341  | <i>Ankrd49</i> | -1.208 | Moderate              |
| <i>mir-452</i>     | 1.193  | <i>Cdh18</i>   | -1.245 | Moderate              |
| <i>mir-151-5p</i>  | 1.153  | <i>Cldn1</i>   | -1.293 | Moderate              |
| <i>mir-743a</i>    | 1.341  | <i>Cldn1</i>   | -1.293 | Moderate              |
| <i>mir-124*</i>    | -1.316 | <i>Cspp1</i>   | 1.344  | High                  |
| <i>mir-369-5p</i>  | -1.336 | <i>Cspp1</i>   | 1.344  | High                  |
| <i>mir-199b*</i>   | -1.206 | <i>Cspp1</i>   | 1.344  | Moderate              |
| <i>mir-495</i>     | -1.232 | <i>Cspp1</i>   | 1.344  | High                  |
| <i>mir-340-5p</i>  | 1.217  | <i>Ddit4l</i>  | -1.260 | High                  |
| <i>mir-743a</i>    | 1.341  | <i>Ddit4l</i>  | -1.260 | Moderate              |
| <i>mir-200a*</i>   | 1.178  | <i>Ddit4l</i>  | -1.260 | High                  |
| <i>mir-27a</i>     | -1.379 | <i>Dnajc13</i> | 1.269  | High                  |
| <i>mir-30a*</i>    | -1.279 | <i>Dnajc13</i> | 1.269  | High                  |
| <i>mir-200a*</i>   | 1.178  | <i>Eapp</i>    | -1.215 | High                  |
| <i>mir-369-5p</i>  | -1.336 | <i>Ephb1</i>   | 1.256  | High                  |
| <i>mir-495</i>     | -1.232 | <i>Ephb1</i>   | 1.256  | High                  |
| <i>mir-369-5p</i>  | 1.336  | <i>Fam155a</i> | 1.329  | High                  |
| <i>mir-30a*</i>    | -1.279 | <i>Fam155a</i> | 1.329  | High                  |
| <i>mir-495</i>     | -1.232 | <i>Fam155a</i> | 1.329  | Moderate              |
| <i>let-7d*</i>     | -1.463 | <i>Ghrhr</i>   | 1.242  | Moderate              |
| <i>mir-124*</i>    | -1.316 | <i>Gpatch8</i> | 1.243  | High                  |
| <i>mir-15a*</i>    | -1.184 | <i>Gpatch8</i> | 1.243  | High                  |
| <i>mir-369-5p</i>  | -1.336 | <i>Gpatch8</i> | 1.243  | High                  |
| <i>mir-199b*</i>   | -1.206 | <i>Gpatch8</i> | 1.243  | High                  |
| <i>mir-25</i>      | -1.224 | <i>Gpatch8</i> | 1.243  | High                  |
| <i>mir-495</i>     | -1.232 | <i>Gpatch8</i> | 1.243  | Moderate              |
| <i>mir-331-3p</i>  | -1.174 | <i>Gpatch8</i> | 1.243  | Moderate              |
| <i>mir-34b-3p</i>  | -1.334 | <i>Gpatch8</i> | 1.243  | Moderate              |
| <i>mir-423-5p</i>  | -1.159 | <i>Gpatch8</i> | 1.243  | Moderate              |
| <i>let-7d*</i>     | -1.463 | <i>Hmga2</i>   | 1.220  | Experimentally Proven |
| <i>mir-15a*</i>    | -1.184 | <i>Hmga2</i>   | 1.220  | High                  |
| <i>mir-369-5p</i>  | -1.336 | <i>Hmga2</i>   | 1.220  | High                  |
| <i>mir-25</i>      | -1.224 | <i>Hmga2</i>   | 1.220  | High                  |
| <i>mir-495</i>     | -1.232 | <i>Hmga2</i>   | 1.220  | Moderate              |
| <i>mir-362-5p</i>  | -1.167 | <i>Hmga2</i>   | 1.220  | Moderate              |
| <i>mir-19b</i>     | 1.375  | <i>Kl</i>      | -1.271 | Moderate              |
| <i>mir-151-5p</i>  | 1.153  | <i>Kl</i>      | -1.271 | Moderate              |
| <i>mir-669h-3p</i> | 1.608  | <i>Kl</i>      | -1.271 | Moderate              |
| <i>mir-504</i>     | 1.258  | <i>Kl</i>      | -1.271 | Moderate              |
| <i>mir-743a</i>    | 1.341  | <i>Kl</i>      | -1.271 | Moderate              |

|                    |        |                |        |          |
|--------------------|--------|----------------|--------|----------|
| <i>mir200a*</i>    | 1.178  | <i>Kl</i>      | -1.271 | Moderate |
| <i>mir-369-5p</i>  | -1.336 | <i>Mmrn2</i>   | 1.214  | Moderate |
| <i>mir-1224</i>    | 1.528  | <i>Nmnat1</i>  | -1.237 | Moderate |
| <i>mir-431</i>     | 1.366  | <i>Nmnat1</i>  | -1.237 | Moderate |
| <i>mir-743a</i>    | 1.341  | <i>Nmnat1</i>  | -1.237 | Moderate |
| <i>mir-146b</i>    | 1.237  | <i>Nuak1</i>   | -1.324 | High     |
| <i>mir-19b</i>     | 1.375  | <i>Nuak1</i>   | -1.324 | High     |
| <i>mir-151-5p</i>  | 1.153  | <i>Nuak1</i>   | -1.324 | High     |
| <i>mir-146b</i>    | 1.237  | <i>Ogn</i>     | -1.236 | Moderate |
| <i>mir-669h-3p</i> | 1.608  | <i>Ogn</i>     | -1.236 | Moderate |
| <i>mir-200a*</i>   | 1.178  | <i>Ogn</i>     | -1.236 | Moderate |
| <i>mir-152</i>     | 1.208  | <i>Otx2</i>    | -1.270 | High     |
| <i>mir-369-5p</i>  | -1.366 | <i>Polr3e</i>  | 1.204  | Moderate |
| <i>mir-340-5p</i>  | 1.217  | <i>Ppp3cc</i>  | -1.212 | Moderate |
| <i>mir-1224</i>    | 1.528  | <i>Pros1</i>   | -1.239 | Moderate |
| <i>mir-743a</i>    | 1.341  | <i>Pros1</i>   | -1.239 | Moderate |
| <i>mir-369-5p</i>  | -1.336 | <i>Pten</i>    | 1.377  | High     |
| <i>mir-25</i>      | -1.224 | <i>Pten</i>    | 1.377  | High     |
| <i>mir-495</i>     | -1.232 | <i>Pten</i>    | 1.377  | High     |
| <i>mir-19b</i>     | 1.375  | <i>Rps27l</i>  | -1.206 | Moderate |
| <i>mir-743a</i>    | 1.341  | <i>Rps27l</i>  | -1.206 | High     |
| <i>mir-15a*</i>    | -1.184 | <i>Slc24a1</i> | 1.206  | High     |
| <i>mir-27a</i>     | -1.379 | <i>Slc24a1</i> | 1.206  | High     |
| <i>mir-17*</i>     | 1.451  | <i>Slitrk2</i> | -1.202 | High     |
| <i>mir200a*</i>    | 1.178  | <i>Slitrk2</i> | -1.202 | Moderate |
| <i>mir-17*</i>     | 1.451  | <i>Tbc1d17</i> | -1.269 | High     |
| <i>mir-146b</i>    | 1.237  | <i>Tmem19</i>  | -1.231 | High     |
| <i>mir-340-5p</i>  | 1.217  | <i>Tmem19</i>  | -1.231 | High     |
| <i>mir-369-5p</i>  | -1.336 | <i>Tmem217</i> | 1.200  | Moderate |
| <i>mir-743a</i>    | 1.341  | <i>Tmem60</i>  | -1.219 | Moderate |
| <i>mir-151-5p</i>  | 1.153  | <i>Tmem98</i>  | -1.225 | Moderate |
| <i>mir-133b</i>    | -1.352 | <i>Trdn</i>    | 1.208  | Moderate |
| <i>mir-369-5p</i>  | -1.336 | <i>Trdn</i>    | 1.208  | High     |
| <i>mir-27a</i>     | -1.379 | <i>Trdn</i>    | 1.208  | Moderate |
| <i>mir-30a*</i>    | -1.279 | <i>Trdn</i>    | 1.208  | High     |
| <i>mir-495</i>     | -1.232 | <i>Trdn</i>    | 1.208  | High     |
| <i>mir-331-3p</i>  | -1.174 | <i>Trdn</i>    | 1.208  | Moderate |
| <i>mir-369-5p</i>  | -1.336 | <i>Ypell</i>   | 1.222  | High     |
| <i>mir-199b*</i>   | -1.206 | <i>Ypell</i>   | 1.222  | High     |
| <i>mir-27a</i>     | -1.379 | <i>Ypell</i>   | 1.222  | High     |
| <i>mir-30a*</i>    | -1.279 | <i>Ypell</i>   | 1.222  | Moderate |

**Table S2. Genes and miRNAs (identified by respective arrays) that showed significant change in both DNA methylation and expression in the voluntary consumption (CPD) paradigm of FAE in B6 mice.**

| Accession    | Gene Name | Methylation in Control | Methylation in Experimental | Change in Expression | Chromosome |
|--------------|-----------|------------------------|-----------------------------|----------------------|------------|
| NM_001004363 | Nuak1     | 1                      | 1                           | -1.32                | 10         |
| NM_001025244 | Krtap31-2 |                        | 1                           | 1.22                 | 11         |
| NM_001033464 | Efcab4b   |                        | 1                           | 1.26                 | 6          |
| NM_001166595 | Eif5a     | 1                      |                             | -1.20                | 11         |
| NM_001166590 | Eif5a     | 1                      |                             | -1.20                | 11         |
| NM_001166596 | Eif5a     | 1                      |                             | -1.20                | 11         |
| NM_181582    | Eif5a     | 1                      |                             | -1.20                | 11         |
| NM_001166594 | Eif5a     | 1                      |                             | -1.20                | 11         |
| NM_001166593 | Eif5a     | 1                      |                             | -1.20                | 11         |
| NM_008788    | Pcolce    | 1                      |                             | -1.24                | 5          |
| NM_010441    | Hmga2     | 1                      | 1                           | 1.22                 | 10         |
| NM_011758    | Zfp39     |                        | 1                           | -1.26                | 11         |
| NM_173016    | Vat1l     |                        | 1                           | -1.22                | 8          |
| NM_023275    | Rhoj      |                        | 2                           | -1.21                | 12         |
| NM_023331    | Mrpl46    | 1                      |                             | -1.36                | 7          |
| NM_025456    | Eapp      |                        | 1                           | -1.22                | 12         |
| NM_025475    | Haus2     | 1                      |                             | -1.24                | 2          |
| NM_025718    | Dnase1l2  |                        | 1                           | 1.26                 | 17         |
| NM_053127    | Pcdhb2    |                        | 1                           | -1.23                | 18         |
| NM_133435    | Nmnat1    | 1                      |                             | -1.24                | 4          |
| NM_133964    | Dohh      | 2                      | 1                           | -1.25                | 10         |
| NM_144813    | Slc24a1   |                        | 2                           | 1.21                 | 9          |
| NM_153081    | Slc16a1l  | 1                      |                             | -1.21                | 11         |
| NM_001110160 | Lrrc6l    |                        | 1                           | -1.20                | 6          |
| NM_197992    | Pcgfl     | 1                      |                             | -1.26                | 6          |
| NM_206867    | Gm13280   |                        | 1                           | 1.24                 | 4          |
| NR_035503    | Mir1982   | 1                      |                             | 1.42                 | 10         |
| NR_029811    | Mir199b   | 1                      |                             | -1.21                | 2          |
| NR_029815    | Mir19b-1  |                        | 1                           | 1.37                 | 14         |
| NR_030577    | Mir574    |                        | 1                           | 1.28                 | 5          |

|           |        |   |   |      |   |
|-----------|--------|---|---|------|---|
| NR_030492 | Mir711 |   | 2 | 1.28 | 9 |
| NR_030428 | Mir762 | 1 | 1 | 2.22 | 7 |

Information on mature mRNAs expression was taken from gene expression arrays and information on miRNA was obtained from miRNA expression arrays (1.2 Fold change and  $p=0.05$ ). Data on significant ( $p=0.01$ ) methylation differences was obtained from DNA methylation arrays. DNA methylation data is presented as unique peaks seen in either control or experimental samples

**Table S3. Imprinted Genes and miRNAs Showing Differential DNA Methylation in the Voluntary Maternal Consumption Paradigm in B6 mice.**

| Accession    | Gene Name | Methylation in Control | Methylation in Experimental | Chromosome |
|--------------|-----------|------------------------|-----------------------------|------------|
| NM_146250    | Gpr1      |                        | 1                           | 1          |
| NM_028673    | Zdbf2     | 1                      |                             | 1          |
| NR_003258    | Gnas      | 1                      | 1                           | 2          |
| NM_001077510 | Gnas      | 1                      | 1                           | 2          |
| NM_201616    | Gnas      | 1                      | 1                           | 2          |
| NM_019690    | Gnas      |                        | 2                           | 2          |
| NM_201618    | Gnas      | 1                      | 2                           | 2          |
| NM_025543    | Mcts2     | 1                      | 1                           | 2          |
| NR_002846    | Nespas    |                        | 2                           | 2          |
| NM_180960    | Nnat      |                        | 1                           | 2          |
| NM_198854    | Dlx5      |                        | 1                           | 6          |
| NM_001135093 | Klf14     |                        | 1                           | 6          |
| NM_008590    | Mest      |                        | 2                           | 6          |
| NM_183308    | Pon2      | 1                      | 1                           | 6          |
| NM_001130191 | Sgce      |                        | 1                           | 6          |
| NR_023846    | Apeg3     |                        | 1                           | 7          |
| NM_007491    | Art5      |                        | 1                           | 7          |
| NM_009876    | Cdkn1c    | 1                      | 1                           | 7          |
| NR_001592    | H19       |                        | 3                           | 7          |
| NM_001122737 | Igf2      | 2                      |                             | 7          |
| NM_001122736 | Igf2      | 1                      | 1                           | 7          |
| NM_010514    | Igf2      | 2                      |                             | 7          |
| NR_002855    | Igf2as    | 2                      | 1                           | 7          |
| NM_008434    | Kcnq1     |                        | 2                           | 7          |
| NR_001461    | Kcnq1ot1  |                        | 2                           | 7          |
| NM_009377    | Th        |                        | 1                           | 7          |
| NM_024290    | Tnfrsf23  |                        | 1                           | 7          |
| NM_138631    | Tssc4     | 1                      |                             | 7          |
| NM_009074    | Mst1r     |                        | 1                           | 9          |



|              |           |   |   |    |
|--------------|-----------|---|---|----|
| NM_009538    | Plagl1    |   | 2 | 10 |
| NM_016672    | Ddc       |   | 1 | 11 |
| NM_010345    | Grb10     | 1 |   | 11 |
| NM_010052    | Dlk1      | 1 |   | 12 |
| NR_033813    | Dlk1      | 1 |   | 12 |
| NR_027651    | Meg3      |   | 1 | 12 |
| NR_029542    | Mir127    |   | 1 | 12 |
| NR_029550    | Mir136    |   | 1 | 12 |
| NR_029564    | Mir154    |   | 1 | 12 |
| NR_035440    | Mir1906-1 |   | 1 | 12 |
| NR_037313    | Mir1906-2 |   | 1 | 12 |
| NR_029590    | Mir203    |   | 1 | 12 |
| NR_037232    | Mir3071   |   | 1 | 12 |
| NR_037233    | Mir3072   |   | 1 | 12 |
| NR_029765    | Mir337    |   | 1 | 12 |
| NR_029773    | Mir345    | 1 |   | 12 |
| NR_030272    | Mir369    |   | 1 | 12 |
| NR_029878    | Mir377    |   | 1 | 12 |
| NR_029913    | Mir409    |   | 1 | 12 |
| NR_029914    | Mir410    |   | 1 | 12 |
| NR_029917    | Mir412    |   | 1 | 12 |
| NR_029951    | Mir431    |   | 1 | 12 |
| NR_035526    | Mir432    |   | 1 | 12 |
| NR_029952    | Mir433    |   | 1 | 12 |
| NR_029953    | Mir434    |   | 1 | 12 |
| NR_030573    | Mir493    |   | 1 | 12 |
| NR_030437    | Mir496    |   | 1 | 12 |
| NR_030260    | Mir540    |   | 1 | 12 |
| NR_030263    | Mir541    |   | 1 | 12 |
| NR_030425    | Mir665    |   | 1 | 12 |
| NR_030438    | Mir673    | 1 |   | 12 |
| NR_030427    | Mir770    | 2 | 2 | 12 |
| NM_184109    | Rtl1      |   | 1 | 12 |
| NM_010076    | Drd1a     | 1 |   | 13 |
| NM_172812    | Htr2a     |   | 1 | 14 |
| NR_002864    | Peg13     |   | 1 | 15 |
| NM_027052    | Slc38a4   |   | 1 | 15 |
| NM_001164643 | Trappc9   |   | 1 | 15 |
| NM_029640    | Trappc9   |   | 1 | 15 |
| NR_027772    | Airm      | 1 |   | 17 |
| NM_027455    | Qpct      | 1 |   | 17 |

|              |         |   |   |    |
|--------------|---------|---|---|----|
| NM_013667    | Slc22a2 | 1 |   | 17 |
| NM_145952    | Tbc1d12 | 1 |   | 19 |
| NR_001463    | Xist    |   | 1 | X  |
| NM_001081643 | Xlr3b   |   | 1 | X  |
| NM_021365    | Xlr4b   |   | 1 | X  |
| NM_183094    | Xlr4c   |   | 1 | X  |

DNA methylation data is presented as unique peaks seen in either control or experimental samples.

**Table S4. Dysregulated genes snoRNAs in the *Snrpn-Ube3a* region (chromosome 7) identified by miRNA and gene expression arrays.**

| CPD              |                         |             |          | Trimester 1 |             |         | Trimester 2      |             |         | Trimester 3 |             |         |
|------------------|-------------------------|-------------|----------|-------------|-------------|---------|------------------|-------------|---------|-------------|-------------|---------|
| miRNA array      |                         |             |          | ID          | Fold Change | p-value | ID               | Fold Change | p-value | ID          | Fold Change | p-value |
|                  | *No Significant ncRNAs* |             |          | HBII-52-48  | 1.21        | 0.049   | HBII-52-2        | 1.22        | 0.044   | HBII-52-15  | 1.45        | 0.001   |
|                  |                         |             |          | HBII-85-7   | -1.32       | 0.037   | HBII-85-22       | -1.30       | 0.001   | HBII-85-29  | 1.42        | 0.026   |
|                  |                         |             |          | HBII-85-23  | -1.76       | 0.050   | HBII-85-26       | -1.20       | 0.039   |             |             |         |
|                  |                         |             |          | HBII-85-24  | -1.36       | 0.039   |                  |             |         |             |             |         |
|                  |                         |             |          | HBII-85-28  | -1.43       | 0.009   |                  |             |         |             |             |         |
| Expression Array | Ensembl ID              | Fold Change | p-value  | Ensembl ID  | Fold Change | p-value |                  |             |         | Ensembl ID  | Fold Change | p-value |
| MBII-52          | 101805                  | 1.4         | 0.019    | 97244       | 1.39        | 0.009   | *Arrays Not Run* |             |         | 102015      | 1.46        | 0.003   |
|                  | 101980                  | 1.22        | 0.003    | 101805      | 1.22        | 0.050   |                  |             |         | 102017      | 1.31        | 0.017   |
|                  | 101860                  | 1.32        | 0.035    | 101861      | 1.22        | 0.050   |                  |             |         | 102028      | 1.65        | 0.001   |
|                  | 101803                  | 1.22        | 0.002    | 101896      | 1.33        | 0.004   |                  |             |         | 102037      | 1.42        | 0.025   |
|                  | 97244                   | 1.28        | 3.16E-04 | 101917      | 1.32        | 0.017   |                  |             |         | 102046      | 1.27        | 0.022   |
|                  | 101917                  | 1.23        | 0.038    | 101935      | 1.32        | 0.017   |                  |             |         |             |             |         |
|                  | 101951                  | 1.29        | 0.017    | 101935      | 1.49        | 0.029   |                  |             |         |             |             |         |
|                  | 101896                  | 1.22        | 2.09E-04 | 101980      | 1.28        | 0.028   |                  |             |         |             |             |         |
|                  | 101932                  | 1.22        | 2.06E-04 | 102037      | 1.33        | 0.038   |                  |             |         |             |             |         |
|                  |                         | 101816      | 1.43     | 0.004       |             |         |                  |             |         |             |             |         |

The Ensembl IDs were shortened by removing the ENSMUST0000000 from the beginning of them.

**Table S5. Dysregulated imprinted miRNAs encoded in the *Sfmbt2* region (chromosome 2) identified by miRNA expression arrays.**

| CPD             |             | Trimester 1 |                 |             |         | Trimester 2       |             |         |                   | Trimester 3 |         |
|-----------------|-------------|-------------|-----------------|-------------|---------|-------------------|-------------|---------|-------------------|-------------|---------|
| ID              | Fold Change | p-value     | ID              | Fold Change | p-value | ID                | Fold Change | p-value | ID                | Fold Change | p-value |
| miR-466f-3p     | 1.37        | 0.024       | hp_mmu-mir-669j | 1.72        | 0.002   | miR-466b-3p       | -1.35       | 0.038   | miR-467b          | 1.25        | 0.038   |
| miR-467c        | -1.23       | 0.01        |                 |             |         | miR-669a          | -1.78       | 0.05    | miR-467a-1*       | -1.31       | 0.037   |
| miR-467a*       | 1.87        | 0.007       |                 |             |         | miR-466e-3p       | -1.49       | 0       | hp_mmu-mir-297c   | -1.27       | 0.037   |
| miR-466c-3p     | 1.23        | 0.003       |                 |             |         | miR-466c-3p       | -1.9        | 0.03    | hp_mmu-mir-466e   | -1.71       | 0.034   |
| miR-669h-3p     | 1.61        | 0.005       |                 |             |         | hp_mmu-mir-297b   | -1.44       | 0.031   | hp_mmu-mir-466f-2 | -1.6        | 0.046   |
| hp_mmu-mir-466h | 1.28        | 0.027       |                 |             |         | hp_mmu-mir-297c   | -1.56       | 0.016   | hp_mmu-mir-466h   | -1.58       | 0.03    |
|                 |             |             |                 |             |         | hp_mmu-mir-466    | -1.31       | 0.028   | hp_mmu-mir-669j   | -1.44       | 0.001   |
|                 |             |             |                 |             |         | hp_mmu-mir-466f-2 | -1.26       | 0.045   | hp_mmu-mir-669m-1 | -1.42       | 0.019   |
|                 |             |             |                 |             |         | hp_mmu-mir-669d   | -2.11       | 0.027   |                   |             |         |

Hairpin precursors contain “hp\_” before the miRNA

**Table S6. Dysregulated ncRNAs from the *Dlk1-Dio3* region (chromosome 12) identified by miRNA and gene expression arrays.**

| CPD              |            | Trimester 1 |         |                         | Trimester 2 |         |                             | Trimester 3 |         |                             |             |         |
|------------------|------------|-------------|---------|-------------------------|-------------|---------|-----------------------------|-------------|---------|-----------------------------|-------------|---------|
| miRNA array      | ID         | Fold Change | p-value | ID                      | Fold Change | p-value | ID                          | Fold Change | p-value | ID                          | Fold Change | p-value |
|                  | miR-679    | 1.21        | 0.03    | miR-665                 | 1.16        | 0.047   | miR-666-5p                  | -1.19       | 0.003   | miR-665                     | -1.21       | 0.032   |
|                  | miR-300    | -1.32       | 0.048   |                         |             |         | miR-369-5p                  | 1.29        | 0.003   | miR-434-3p                  | 1.15        | 0.007   |
|                  |            |             |         |                         |             |         | hp_mmu-mir-300 <sup>C</sup> | 1.28        | 0.021   | miR-376b                    | -1.7        | 0.043   |
|                  |            |             |         |                         |             |         | hp_mmu-mir-379 <sup>C</sup> | -1.24       | 0.031   | miR-544                     | -1.26       | 0.022   |
|                  |            |             |         |                         |             |         |                             |             |         | hp_mmu-mir-485 <sup>C</sup> | -1.25       | 0.04    |
| Expression Array | Ensembl ID | Fold Change | p-value |                         |             |         |                             |             |         | Ensembl ID                  | Fold Change | p-value |
| SNORD 113        | 082745     | 1.30        | 0.019   | *No Significant ncRNAs* |             |         | *Arrays Not Run*            |             |         | 082553                      | -1.46       | 0.012   |
|                  | 082553     | 1.27        | 0.022   |                         |             |         |                             |             |         | 082611                      | -1.46       | 0.012   |
|                  | 082611     | 1.27        | 0.022   |                         |             |         |                             |             |         | 082786                      | 1.56        | 0.038   |
|                  | 082786     | 1.24        | 0.036   |                         |             |         |                             |             |         | 082792                      | -1.31       | 0.005   |

Hairpin precursors contain “hp\_” before the miRNA

The Ensembl IDs were shortened by removing the ENSMUST0000000 from the beginning of them.
